# Supplementary material for: HIV epidemiology and challenges in prevention, testing and treatment in Eastern Europe and Central Asia: mixed-method programme review
Source: Research Square preprint supplement (doi:10.21203/rs.3.rs-8565054/v1), 2026-02-06
Supplement: Supplementary file 1 [file 3d98fea27f625f66dde405ae.docx]

Supplementary Files

**Supplementary File 1. Percentage of individuals among key populations who report receiving the prevention package that includes at least two of the following: condoms and lubricant, counselling on condom use and safe sex, and testing for sexually transmitted infections (STI)s from a nongovernmental organization, health-care provider or other sources**

|  | **MSM** | | | | **PWID** | | | | **SW** | | | | **TG** | | | |
| --- | --- | --- | --- | --- | --- | --- | --- | --- | --- | --- | --- | --- | --- | --- | --- | --- |
|  | 2019 or before | year | 2021 or later | year | 2019 or before | year | 2021 or later | year | 2019 or before | year | 2021 or later | year | 2019 or before | year | 2021 or later | year |
| Albania | 28.9% | 2019 | n/a |  | 77.9% | 2019 | n/a |  | n/a |  | 75.3% | 2024 | n/a |  | n/a |  |
| Armenia | 38.9% | 2018 | 39.5% | 2021 | 38.1% | 2018 | 27.2% | 2021 | 96.9% | 2018 | 46.7% | 2021 | 89.9% | 2018 | 77.0% | 2021 |
| Azerbaijan | n/a |  | 24.9% | 2023 | n/a |  | 33.9% | 2023 | n/a |  | 50.1% | 2023 | n/a |  | 65.0% | 2023 |
| Belarus | 69.4% | 2017 | 28.8% | 2024 | 67.1% | 2017 | 71.7% | 2024 | 84.0% | 2017 | 70.4% | 2024 | n/a |  | 25.5% | 2024 |
| Georgia | n/a |  | 16.8% | 2023 | n/a |  | 49.3% | 2022 | n/a |  | 57.1% | 2024 | n/a |  | 54.0% | 2024 |
| Kazakhstan | n/a |  | 59.5% | 2021 | 63.1% | 2020 | 74.2% | 2022 | 89.6% | 2019 | 91.9% | 2021 | n/a |  | n/a |  |
| Kyrgyzstan | 37.8% | 2017 | 51.2% | 2022 | 40.4% | 2017 | 53.9% | 2022 | n/a |  | 57.0% | 2023 | n/a |  | n/a |  |
| Republic of Moldova | 63.2% | 2017 | 50.8% | 2024 | 39.0% | 2017 | 41.3% | 2024 | 60.7% | 2017 | 26.2% | 2024 | n/a |  | n/a |  |
| Montenegro | n/a |  | n/a |  | n/a |  | 55.0% | 2021 | n/a |  | 17.2% | 2021 | n/a |  | n/a |  |
| North Macedonia | 52.3% | 2018 | n/a |  | 67.0% | 2018 | n/a |  | 80.9% | 2018 | n/a |  | n/a |  | n/a |  |
| Tajikistan | n/a |  | 77.4% | 2022 | 67.2% | 2018 | 39.9% | 2022 | 47.3% | 2018 | 77.1% | 2022 | n/a |  | n/a |  |
| Ukraine# | 25.2 | 2018 | 33% | 2021 | 58.3 | 2018 | 81.9% | 2021 | 46.0 | 2018 | 63.9% | 2021 | 13.0 | 2018 | 44.0% | 2021 |
| EECA Average* | 50.7% |  | 44.3% |  | 62.5% |  | 54.7% |  | 74.9% |  | 56.9% |  | n/a |  | 35.4% |  |

EECA: Eastern Europe and Central Asia, MSM: men who have sex with men; n/a: not available; PWID: people who inject drugs; SW: sex workers; TG: transgender people.

Data source: Global AIDS Monitoring. The latest available data from 2019 or before and from 2021 or later were compared to assess the change in coverage over time.

#data areextracted from the programme review report. Denominators and nominators were unavailable and were not included in the average calculation.

*Combined the numerators and denominators for all countries and calculated a single percentage.

**Supplementary File 2. Percentage of individuals among key populations who tested for HIV in the past 12 months, or who know they are living with HIV**

|  | **MSM** | | | | **PWID** | | | | **SW** | | | | **TG** | | | |
| --- | --- | --- | --- | --- | --- | --- | --- | --- | --- | --- | --- | --- | --- | --- | --- | --- |
|  | 2019 or before | year | 2021 or later | year | 2019 or before | year | 2021 or later | year | 2019 or before | year | 2021 or later | year | 2019 or before | year | 2021 or later | year |
| Albania | 39.3% | 2019 | 50.9% | 2024 | 50.8% | 2019 | 56.4% | 2024 | 30.6% | 2019 | 58.0% | 2024 | n/a |  | n/a |  |
| Armenia | 74.3% | 2018 | 79.2% | 2021 | 58.3% | 2018 | 74.1% | 2021 | 78.7% | 2018 | 92.2% | 2021 | 100.0% | 2018 | 97.9% | 2021 |
| Azerbaijan | 43.6% | 2018 | 25.4% | 2023 | 18.6% | 2018 | 40.4% | 2023 | 16.0% | 2018 | 33.5% | 2023 | n/a |  | 4.3% | 2023 |
| Belarus | 68.6% | 2017 | 69.6% | 2024 | 59.7% | 2017 | 68.7% | 2024 | 71.8% | 2017 | 80.6% | 2024 | n/a |  | 53.0% | 2024 |
| Georgia | 55.5% | 2018 | 77.5% | 2023 | n/a |  | 100.0% | 2023 | n/a |  | 76.3% | 2024 | n/a |  | 79.4% | 2024 |
| Kazakhstan | 99.0% | 2019 | 89.8% | 2023 | 77.1% | 2018 | 85.8% | 2023 | 98.7% | 2019 | 95.5% | 2023 | n/a |  | n/a |  |
| Kyrgyzstan | n/a |  | 78.0% | 2022 | n/a |  | 100.0% | 2022 | 57.5% | 2016 | 80.0% | 2023 | n/a |  | 87.9% | 2022 |
| Republic of Moldova | 44.3% | 2017 | 53.6% | 2024 | 48.8% | 2017 | 64.6% | 2024 | 31.7% | 2017 | 40.8% | 2024 | n/a |  | n/a |  |
| Montenegro | n/a |  | n/a |  | n/a |  | 13.5% | 2021 | n/a |  | 11.0% | 2021 | n/a |  | n/a |  |
| North Macedonia | 32.6% | 2018 | n/a |  | 37.4% | 2017 | n/a |  | 49.1% | 2018 | n/a |  | n/a |  | n/a |  |
| Tajikistan | n/a |  | 53.3% | 2022 | 98.1% | 2018 | 65.1% | 2022 | 98.8% | 2018 | 55.9% | 2022 | n/a |  | n/a |  |
| Ukraine | 39.2% | 2017 | 72.0% | 2021 | 43.1% | 2017 | n/a |  | 58.2% | 2017 | 64.2% | 2021 | n/a |  | 48.2% | 2024 |
| EECA Average* | 55.2% |  | 64.9% |  | 54.7% |  | 66.9% |  | 59.1% |  | 62.5% |  | n/a |  | 61.8% |  |

EECA: Eastern Europe and Central Asia, MSM: men who have sex with men; n/a: not available; PWID: people who inject drugs; SW: sex workers; TG: transgender people.

Data source: Global AIDS Monitoring. The latest available data from 2019 or before and from 2021 or later were compared to assess the change in coverage over time.

*This is the average of the reported percentages due to the lack of numerator and denominator data.

**Supplementary File 3. Antiretroviral therapy coverage among key populations**

|  | **MSM** | | | | **PWID** | | | | **SW** | | | | **TG** | | | |
| --- | --- | --- | --- | --- | --- | --- | --- | --- | --- | --- | --- | --- | --- | --- | --- | --- |
| 2019 or before | year | 2021 or after | year | 2019 or before | year | 2021 or after | year | 2019 or before | year | 2021 or after | year | 2019 or before | year | 2021 or after | year |
| Albania | n/a |  | n/a |  | n/a |  | n/a |  | n/a |  | n/a |  | n/a |  | n/a |  |
| Armenia | n/a |  | n/a |  | n/a |  | n/a |  | n/a |  | n/a |  | n/a |  | n/a |  |
| Azerbaijan | n/a |  | 96.7% | 2024 | n/a |  | 88.9% | 2024 | n/a |  | 100.0% | 2024 | n/a |  | n/a |  |
| Belarus | n/a |  | 87.3% | 2024 | 40.5% | 2018 | 97.1% | 2024 | n/a |  | 95.7% | 2024 | n/a |  | n/a |  |
| Georgia | n/a |  | n/a |  | n/a |  | n/a |  | n/a |  | 100.0% | 2024 | n/a |  | n/a |  |
| Kazakhstan | n/a |  | 66.2% | 2023 | n/a |  | 65.5% | 2023 | n/a |  | 75.0% | 2023 | n/a |  | n/a |  |
| Kyrgyzstan | n/a |  | 50.0% | 2022 | n/a |  | 77.0% | 2022 | n/a |  | 31.3% | 2023 | n/a |  | 100.0% | 2022 |
| Republic of Moldova | n/a |  | 97.0% | 2024 | 85.2% | 2017 | 67.0% | 2024 | 55.1% | 2017 | 75.1% | 2024 | n/a |  | n/a |  |
| Montenegro | n/a |  | n/a |  | n/a |  | n/a |  | n/a |  | n/a |  | n/a |  | n/a |  |
| North Macedonia | 91.4% | 2017 | n/a |  | n/a |  | n/a |  | n/a |  | n/a |  | n/a |  | n/a |  |
| Tajikistan | 78.0% | 2018 | 92.1% | 2024 | 57.7% | 2018 | 76.2% | 2024 | 74.4% | 2018 | 86.5% | 2024 | n/a |  | 100.0% | 2022 |
| Ukraine | 46.3% | 2017 | 55.4% | 2021 | 37.9% | 2017 | 86.2% | 2021 | 29.0% | 2017 | 78.0% | 2021 | n/a |  | 90.9% | 2024 |
| EECA Average* | 55.9% |  | 60.8% |  | 44.9% |  | 80.5% |  | 43.6% |  | 84.3% |  | n/a |  | 94.7% |  |

EECA: Eastern Europe and Central Asia, MSM: men who have sex with men; n/a: not available; PWID: people who inject drugs; SW: sex workers; TG: transgender people.

Data source: Global AIDS Monitoring. The latest available data from 2019 or before and from 2021 or later were compared to assess the change in coverage over time.

*Combined the numerators and denominators for all countries and calculated a single percentage.

**Supplementary File 4 Identified shared achievements and challenges in the WHO Country Programme Reviews**

|  | **Achievements** | **Challenges** | |
| --- | --- | --- | --- |
| **A. Epidemic patterns and surveillance system** | ▪Case-based HIV surveillance is widely implemented in the reviewed countries ▪Case definitions and Monitoring and Evaluation indicators are aligned with WHO/UNAIDS guidance ▪IBBS is widely implemented and contributes to data on KPs | | ▪Some countries use a paper-based system for HIV surveillance, with development or development plans for electronic database systems ▪Collected data tends to be underutilised and misinterpreted ▪High probability of misclassification of the mode of transmission |
| **B. Testing and treatment** | ▪Commitments for expanding access to HIV testing and quality care for PLHIV ▪Progress towards achieving UNAIDS 95%-95%-95% targets, especially for the second and third targets ▪Increasing clinical capacity to manage PLHIV ▪Adoption of "Treat All" approach | | ▪Late diagnosis rate remains high, and assessment of the underlying reasons is not conducted adequately ▪Limited use of innovative approaches, including self-testing and lay-provider testing  ▪Centralised testing systems for screening, confirmatory and viral load testing  ▪Weak quality management systems at testing sites, including but not limited to laboratories with a particular focus on turnaround time from screening to confirmatory testing (or ART initiation), inefficient procurement and inventory of consumables, reagents and tests, regular training and capacity building of HIV laboratories and EQA panel testing ▪Limited access and use of dual HIV/syphilis rapid diagnostic testing ▪Transition to a Dolutegravir-based regimen was observed, but implementation pace varied between countries ▪Implementation of multi-month dispensation of ART varied between countries  ▪Efforts towards decentralised HIV treatment were observed, but not adequately implemented ▪No pretreatment HIV drug resistance surveys conducted ▪Lack of integration with other related infections and conditions (e.g. viral hepatitis, mental health, hypertension) ▪Limited access to medications for the treatment of opportunistic infections |
| **C. KPs** | ▪All countries implemented key population programmes ▪Innovative approach (e.g. mobile units, online outreach) is used in most countries | | ▪Data on and programmes for TG are limited ▪The testing coverage among KPs varied, and the measuring approach is inconsistent  ▪Funding for key population programmes is heavily relying on international donors and a slow transition to government funding ▪Difficulties in reaching hidden populations, such as young KPs, females who inject drugs, MSM and their sexual partners ▪Range and quality of the prevention package are not fully aligned with WHO recommendations ▪A high level of stigma and discrimination towards KPs, including among healthcare workers |

ART: antiretroviral therapy, IBBS: Integrated Biological and Behavioural Surveillance, EQA: External quality assurance, KP: key population, MSM: men who have sex with men, PLHIV: people living with HIV, TG: transgender people.
